# Supplementary material for: Water oxidation catalyzed by two cobalt complexes: new challenges and questions
Source: Royal Society of Chemistry journal article supplement (doi:10.1039/c7cy02602a), 2018-01-01
Supplement: c7cy02602a1.pdf [file c7cy02602a1.pdf]

# **Electronic Supplementary Information**

# Water oxidation catalyzed by two cobalt complexes: New challenges and questions

Mohammad Mahdi Najafpour,<sup>\*a-c</sup> and Hadi Feizi<sup>a</sup>

<sup>a</sup>*Department of Chemistry, Institute for Advanced Studies in Basic Sciences (IASBS), Zanjan, 45137-66731, Iran*

<sup>b</sup>*Center of Climate Change and Global Warming, Institute for Advanced Studies in Basic Sciences (IASBS), Zanjan, 45137-66731, Iran*

<sup>c</sup>*Research Center for Basic Sciences & Modern Technologies (RBST), Institute for Advanced Studies in Basic Sciences (IASBS), Zanjan 45137-66731, Iran*

*\*Corresponding author; Phone: (+98) 24 3315 3201; E-mail: [mmnajafpour@iasbs.ac.ir](mailto:mmnajafpour@iasbs.ac.ir)*

*†Electronic Supplementary Information (ESI) available: [details of any supplementary information available should be included here]. See DOI: 10.1039/b000000x/*

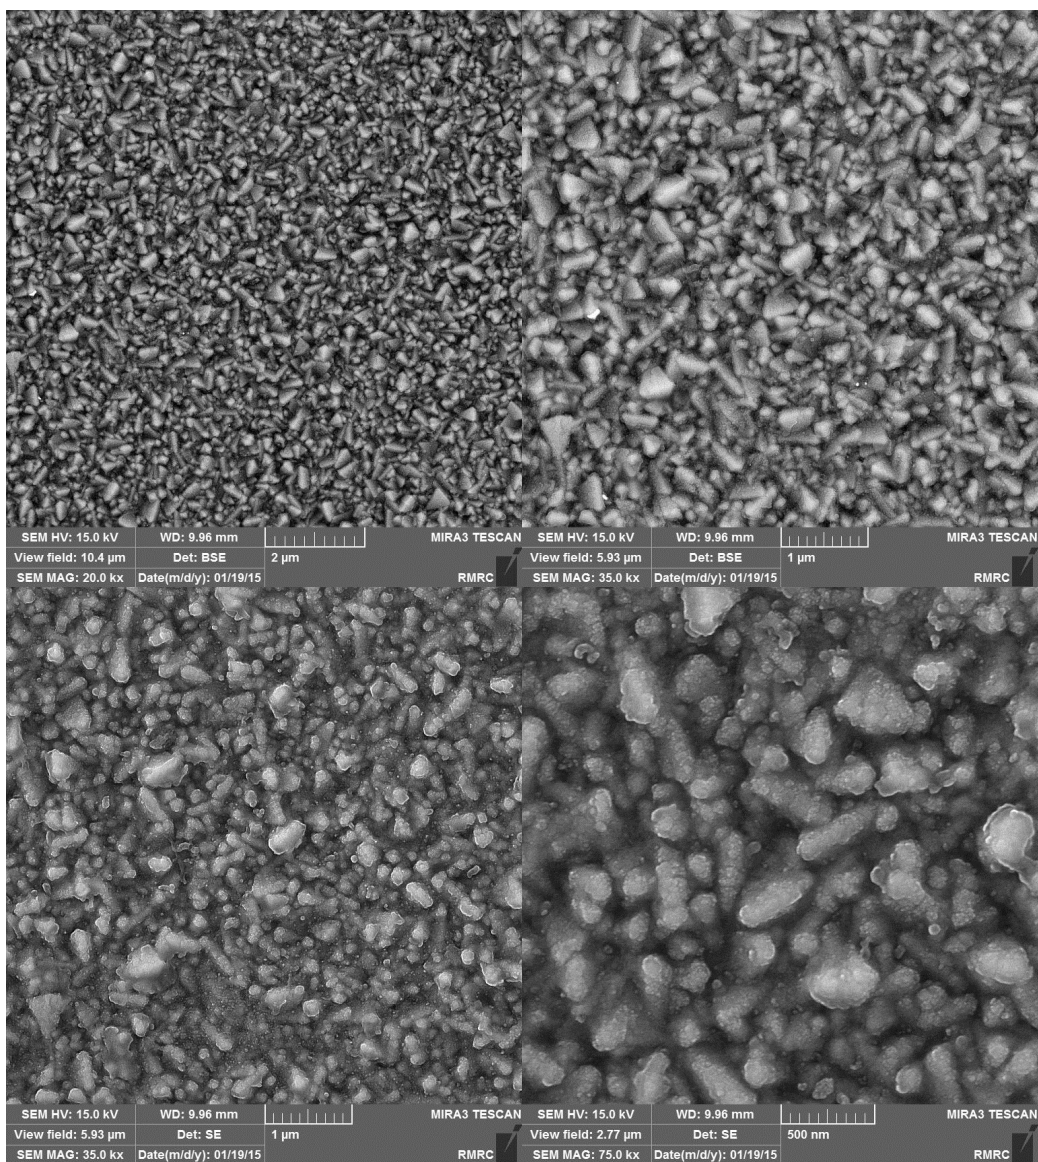

Fig. S1 SEM images from fresh FTO.

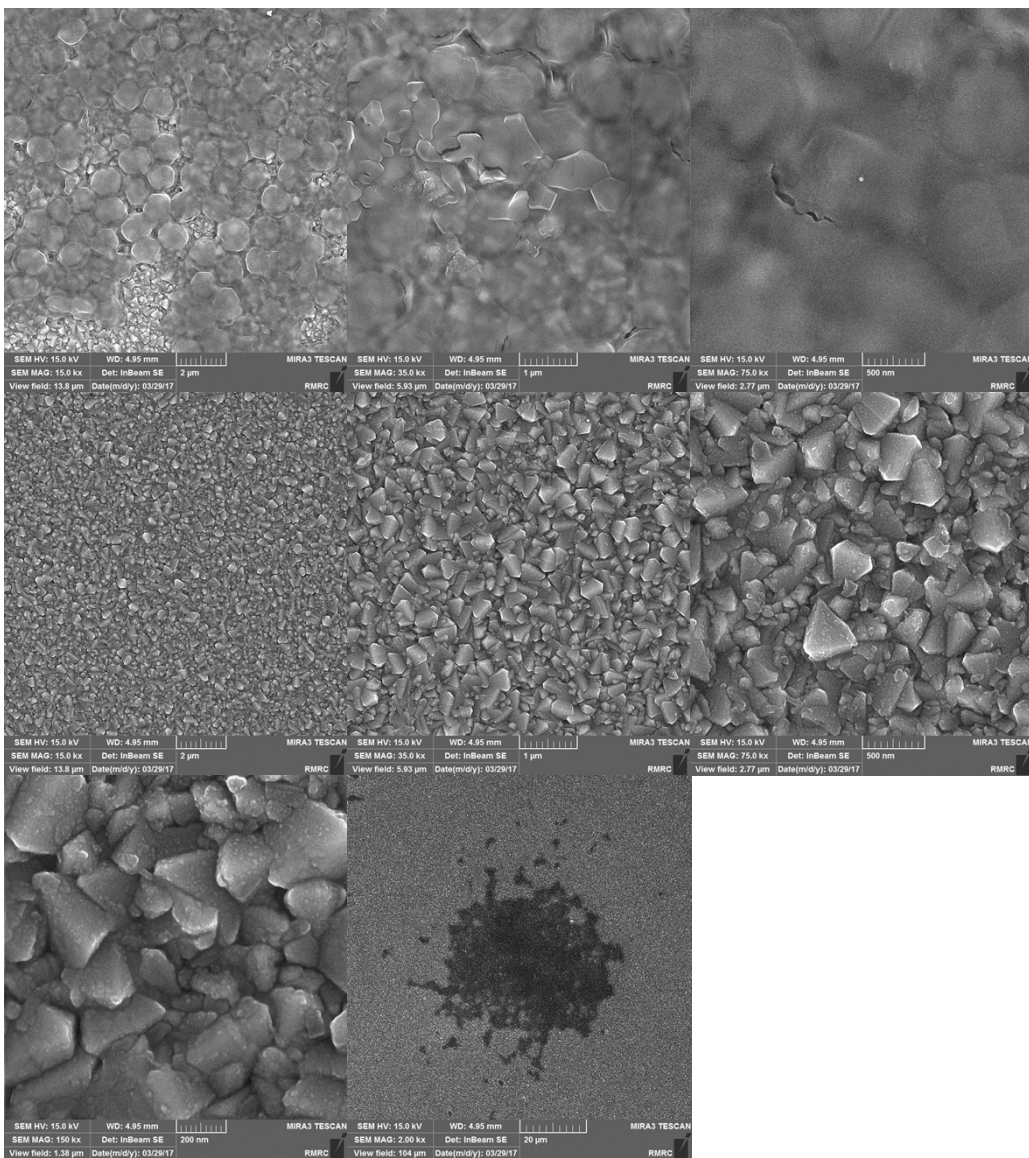

Fig. S2 SEM images for **1** under amperometry condition after 10 hours. Amperometric condition: 1.8 V; in the mixture of phosphate buffer (0.25 M, pH = 11.0) : DMF (3:1).

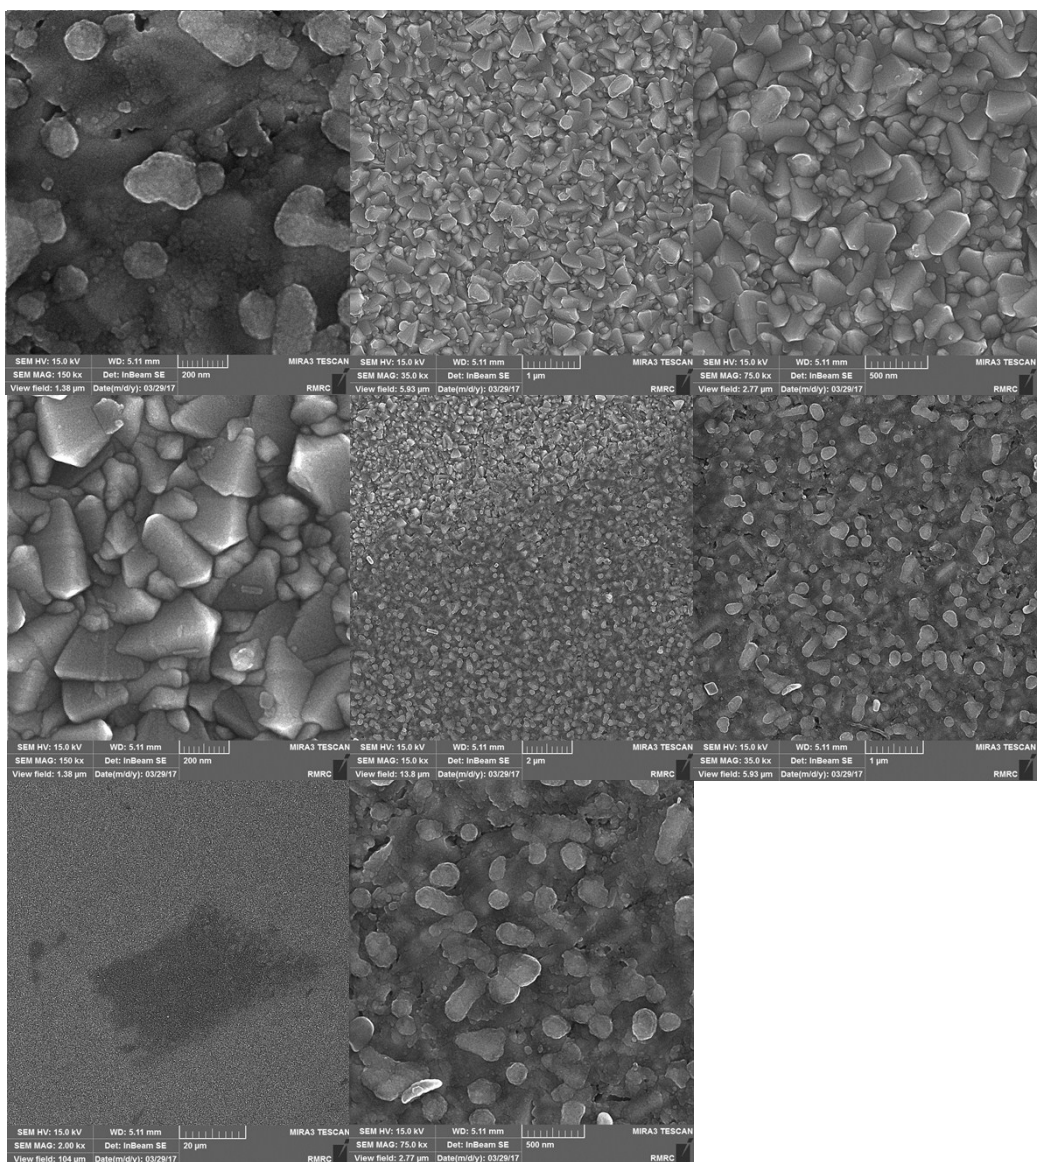

Fig. S3 SEM images for **1** under amperometry condition after 10 hours. Amperometric condition: 1.8 V; in the mixture of phosphate buffer (0.25 M, pH = 7.0) : DMF (3:1).

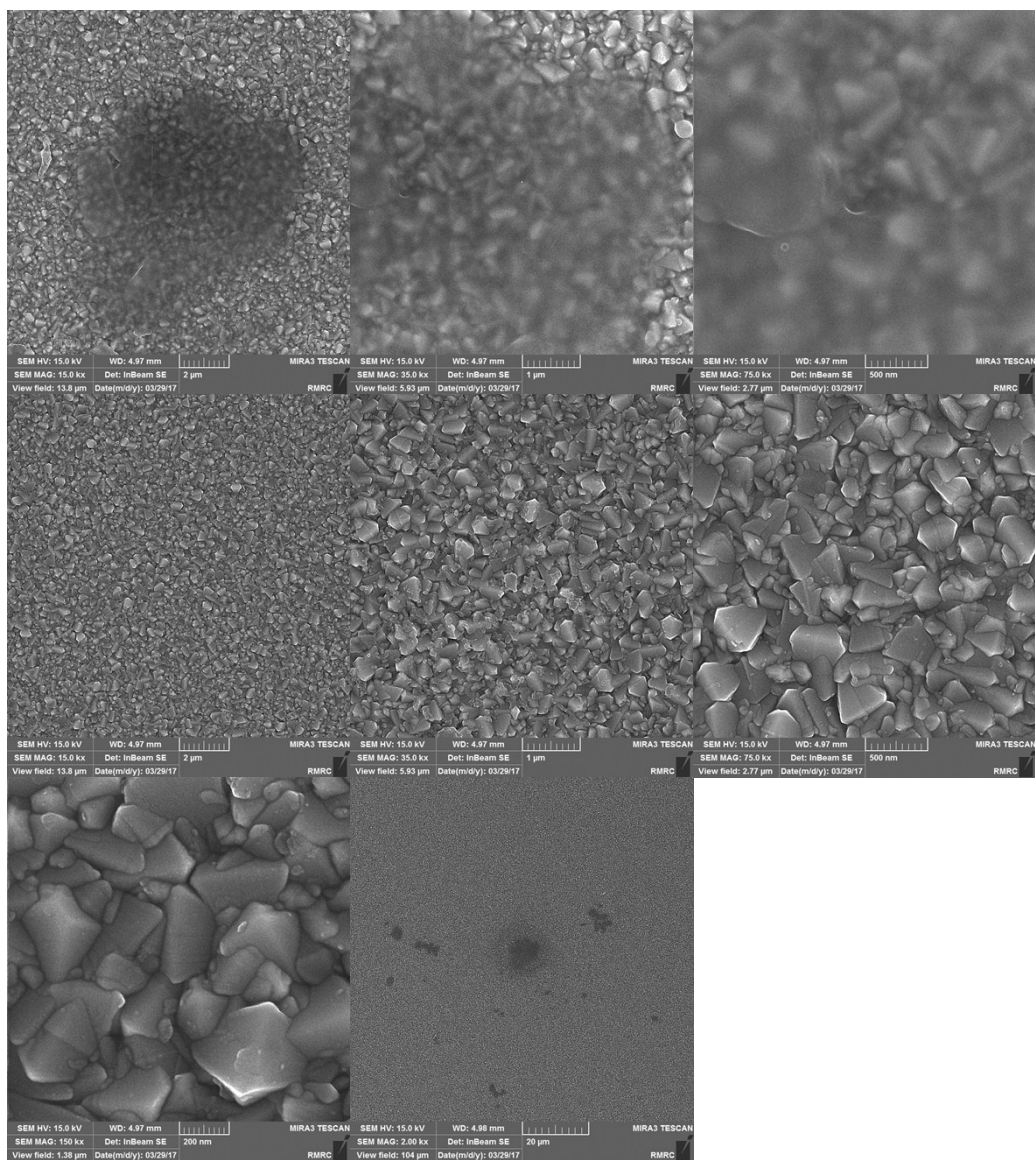

Fig. S4 SEM spectra for **1** under amperometry condition after 10 hours. Amperometric condition: 1.8 V; in the mixture of phosphate buffer (0.25 M, pH = 3.0) : DMF (3:1).

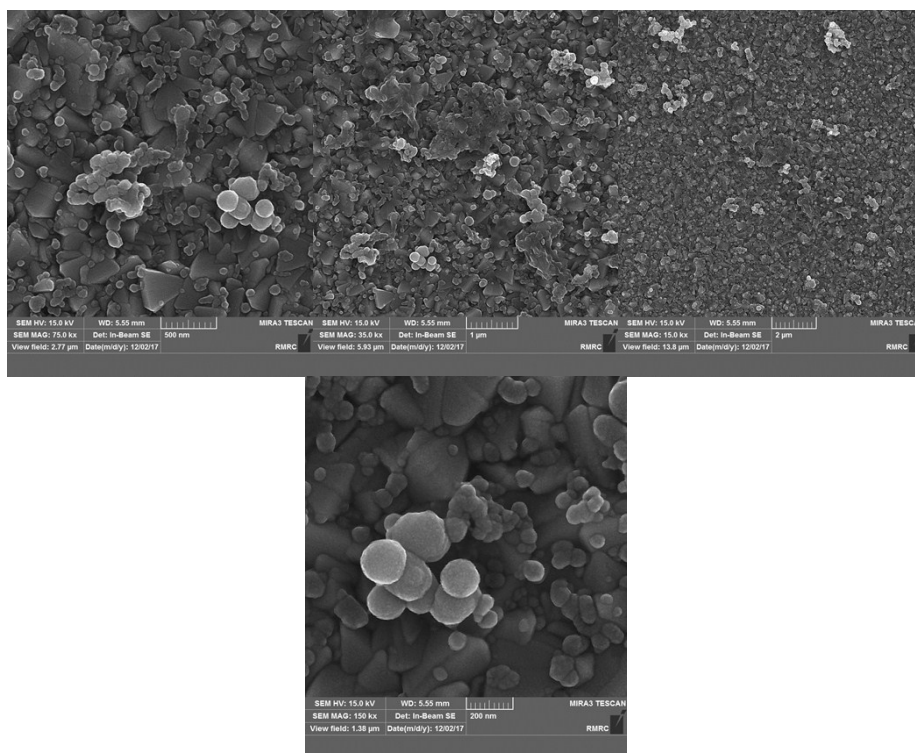

Fig. S5 SEM images for **2** under amperometry condition after 10 hours. Amperometric condition: 1.6 V; in the mixture of phosphate buffer (0.25 M, pH = 11.0) : DMF (3:1).

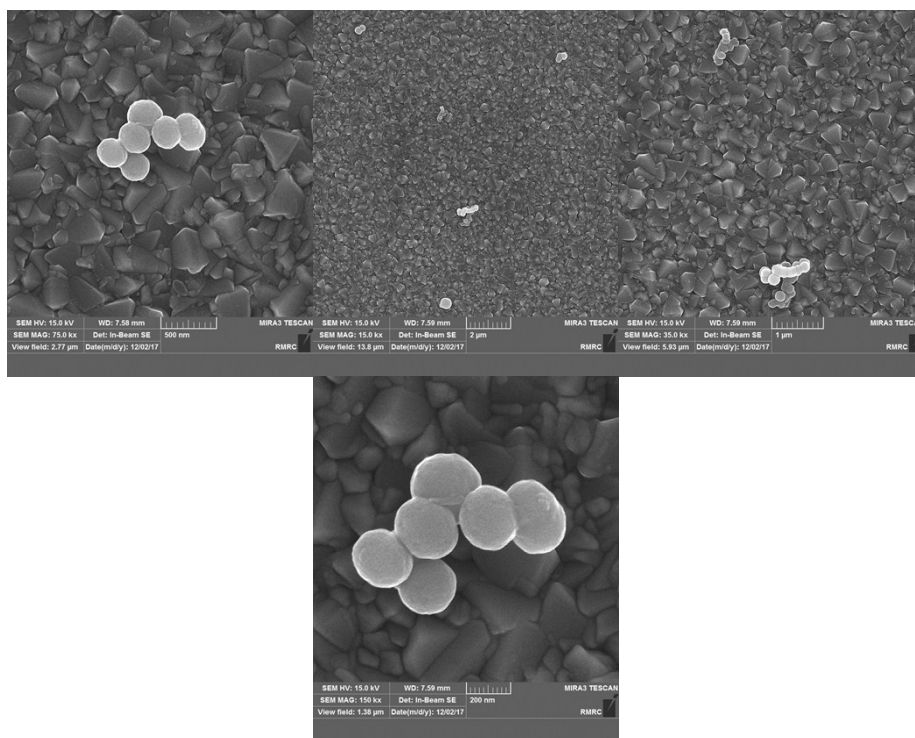

Fig. S6 SEM images for cobalt salt under amperometry condition after 10 hours. Amperometric condition: 1.6 V; in the mixture of phosphate buffer (0.25 M, pH = 11.0) : DMF (3:1).
